# Supplementary material for: Adipic acid production catalyzed by a combination of a solid acid and an iodide salt from biomass-derived tetrahydrofuran-2,5-dicarboxylic acid
Source: Royal Society of Chemistry journal article supplement (doi:10.1039/c8cy00379c), 2018-01-01
Supplement: c8cy00379c1.pdf [file c8cy00379c1.pdf]

*Supporting Information for*

**Adipic Acid Production Catalyzed by a Combination of a Solid Acid and an Iodide Salt from  
Biomass-Derived Tetrahydrofuran-2,5-dicarboxylic Acid**

Matthew J. Gilkey, Rachana Balakumar, Dionisios G. Vlachos\*, Bingjun Xu\*

Catalysis Center for Energy Innovation, Department of Chemical & Biomolecular Engineering,  
University of Delaware, 19716

Emails: vlachos@udel.edu, bxu@udel.edu

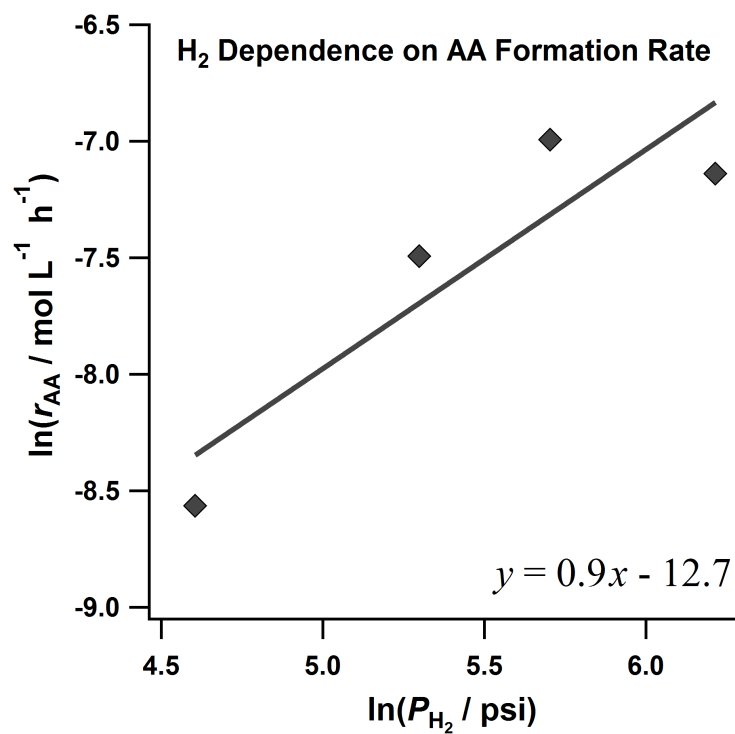

**Figure S1.** Reaction order with respect to H<sub>2</sub> partial pressure for THFDCA hydrogenolysis in the presence of Nafion and lithium iodide in propionic acid, illustrating H<sub>2</sub>'s ~1<sup>st</sup> order relationship. Linear least-squares regression of the log-log plot results in a slope of ~0.9.
